# Supplementary material
Source: bioRxiv or medRxiv preprint supplement (https://www.biorxiv.org/highwire/filestream/106590/field_highwire_adjunct_files/0/351148-1.pdf)
Supplement: Supplementary file [file 351148-1.pdf]

# Supplementary Information

We employed Bayesian Mixed Models for our analyses. In the main text, we report the probabilities that the model parameter for modality is non-zero, and the odds that modality influenced our measures. This information was derived by fitting, for each dependent variable, a Markov Chain Monte Carlo model. Weakly informative priors from the Gaussian family were used that were scaled by the `rstanarm` package. We used random effects for the participant, the story and the trial number, and fixed effects for the modality, the modality order and the stimulus order, specified as:

Dependent variable ~ modality + modality order + stimulus order +  
(1 | participant) + (1 | story) + (1 | trial number)

In the tables below, we report information on the priors and detailed statistics for each models' parameters, including the 95% credibility intervals that are depicted in figures 2 and 3.

We also report the results of 2 (modality) x2 (modality order) x2 (stimulus order) ANOVAs for readers who prefer frequentist analyses.

Analyses were run in R (v3.4.3) using the packages `afex`, `rstanarm` and `psycho`.

Makowski, D. (2017). Efficient and Publishing-Oriented Workflow for Psychological Science with the R Package 'psycho'. Available from <https://github.com/neuropsychology/psycho.R>

R Core Team (2017). R: A language and environment for statistical computing. R Foundation for Statistical Computing, Vienna, Austria. URL <https://www.R-project.org/>

Singmann, H., Bolker, B., Westfall, J., & Aust, F. (2018). `afex`: Analysis of Factorial Experiments. R package version 0.19-1. <https://CRAN.R-project.org/package=afex>

Stan Development Team (2016). `rstanarm`: Bayesian applied regression modeling via Stan. R package version 2.13.1. <http://mc-stan.org/>.

## Engagement Ratings Attention

### Priors:

```

Intercept (after predictors centered)
~ normal(location = 0, scale = 10)
  **adjusted scale = 46.32

Coefficients
~ normal(location = [0,0,0], scale = [2.5,2.5,2.5])
  **adjusted scale = [11.58,11.58,11.58]

Auxiliary (sigma)
~ exponential(rate = 1)
  **adjusted scale = 4.63 (adjusted rate = 1/adjusted scale)

Covariance
~ decov(reg. = 1, conc. = 1, shape = 1, scale = 1)

```

### Estimates of model parameters:

| Variable       | MPE   | Median | MAD  | Mean  | SD   | CI low | CI high |
|----------------|-------|--------|------|-------|------|--------|---------|
| Intercept      | 100   | 12.47  | 0.63 | 12.47 | 0.64 | 11.15  | 13.67   |
| modality       | 100   | 3.53   | 0.22 | 3.53  | 0.22 | 3.09   | 3.95    |
| modality order | 99.18 | -1.29  | 0.55 | -1.29 | 0.55 | -2.32  | -0.18   |
| stimuli order  | 92.45 | 0.78   | 0.55 | 0.79  | 0.55 | -0.26  | 1.89    |

### Anova table:

| Effect                        | df   | MSE  | F    | p    |
|-------------------------------|------|------|------|------|
| stim_order                    | 1,98 | 6.41 | 0.74 | 0.39 |
| mod_order                     | 1,98 | 6.41 | 2.33 | 0.13 |
| stim_order:mod_order          | 1,98 | 6.41 | 0.08 | 0.78 |
| modality                      | 1,98 | 2.24 | 2.99 | 0.09 |
| stim_order:modality           | 1,98 | 2.24 | 0.13 | 0.72 |
| mod_order:modality            | 1,98 | 2.24 | 1.08 | 0.3  |
| stim_order:mod_order:modality | 1,98 | 2.24 | 6.89 | 0.01 |

## Character

### Priors:

Intercept (after predictors centered)

```
~ normal(location = 0, scale = 10)  
  **adjusted scale = 28.56
```

Coefficients

```
~ normal(location = [0,0,0], scale = [2.5,2.5,2.5])  
  **adjusted scale = [7.14,7.14,7.14]
```

Auxiliary (sigma)

```
~ exponential(rate = 1)  
  **adjusted scale = 2.86 (adjusted rate = 1/adjusted scale)
```

Covariance

```
~ decov(reg. = 1, conc. = 1, shape = 1, scale = 1)
```

### Estimates of model parameters:

| Variable       | MPE   | Median | MAD  | Mean  | SD   | CI low | CI high |
|----------------|-------|--------|------|-------|------|--------|---------|
| Intercept      | 100   | 11.34  | 0.38 | 11.35 | 0.39 | 10.58  | 12.1    |
| modality       | 98.15 | 0.34   | 0.15 | 0.34  | 0.16 | 0.01   | 0.66    |
| modality order | 92.13 | -0.48  | 0.34 | -0.48 | 0.35 | -1.21  | 0.14    |
| stimuli order  | 78.73 | -0.26  | 0.33 | -0.26 | 0.34 | -0.89  | 0.44    |

### Anova table:

| Effect                        | df   | MSE   | F      | p      |
|-------------------------------|------|-------|--------|--------|
| stim_order                    | 1,98 | 15.69 | 3.7    | 0.06   |
| mod_order                     | 1,98 | 15.69 | 6.33   | 0.01   |
| stim_order:mod_order          | 1,98 | 15.69 | 0.09   | 0.76   |
| modality                      | 1,98 | 6.13  | 107.07 | <.0001 |
| stim_order:modality           | 1,98 | 6.13  | 0.02   | 0.9    |
| mod_order:modality            | 1,98 | 6.13  | 0.07   | 0.79   |
| stim_order:mod_order:modality | 1,98 | 6.13  | 0      | 0.96   |

## Narrative

### Priors:

Intercept (after predictors centered)

```
~ normal(location = 0, scale = 10)  
  **adjusted scale = 43.19
```

Coefficients

```
~ normal(location = [0,0,0], scale = [2.5,2.5,2.5])  
  **adjusted scale = [10.80,10.80,10.80]
```

Auxiliary (sigma)

```
~ exponential(rate = 1)  
  **adjusted scale = 4.32 (adjusted rate = 1/adjusted scale)
```

Covariance

```
~ decov(reg. = 1, conc. = 1, shape = 1, scale = 1)
```

### Estimates of model parameters:

| Variable       | MPE   | Median | MAD  | Mean  | SD   | CI low | CI high |
|----------------|-------|--------|------|-------|------|--------|---------|
| Intercept      | 100   | 14.03  | 0.58 | 14.03 | 0.59 | 12.82  | 15.13   |
| modality       | 100   | 1.67   | 0.22 | 1.67  | 0.22 | 1.23   | 2.11    |
| modality order | 95.38 | -0.93  | 0.56 | -0.94 | 0.56 | -1.99  | 0.16    |
| stimuli order  | 96.8  | 1.06   | 0.57 | 1.05  | 0.56 | -0.1   | 2.11    |

### Anova table:

| Effect                        | df   | MSE  | F     | p      |
|-------------------------------|------|------|-------|--------|
| stim_order                    | 1,98 | 15.5 | 6.42  | 0.01   |
| mod_order                     | 1,98 | 15.5 | 3.45  | 0.07   |
| stim_order:mod_order          | 1,98 | 15.5 | 0.57  | 0.45   |
| modality                      | 1,98 | 5.14 | 28.94 | <.0001 |
| stim_order:modality           | 1,98 | 5.14 | 0.04  | 0.83   |
| mod_order:modality            | 1,98 | 5.14 | 0.02  | 0.88   |
| stim_order:mod_order:modality | 1,98 | 5.14 | 0.12  | 0.73   |

## Presence

### Priors:

Intercept (after predictors centered)

```
~ normal(location = 0, scale = 10)  
  **adjusted scale = 41.96
```

Coefficients

```
~ normal(location = [0,0,0], scale = [2.5,2.5,2.5])  
  **adjusted scale = [10.49,10.49,10.49]
```

Auxiliary (sigma)

```
~ exponential(rate = 1)  
  **adjusted scale = 4.20 (adjusted rate = 1/adjusted scale)
```

Covariance

```
~ decov(reg. = 1, conc. = 1, shape = 1, scale = 1)
```

### Estimates of model parameters:

| Variable       | MPE   | Median | MAD  | Mean  | SD   | CI low | CI high |
|----------------|-------|--------|------|-------|------|--------|---------|
| Intercept      | 100   | 12.32  | 0.59 | 12.32 | 0.58 | 11.14  | 13.42   |
| modality       | 100   | 1.88   | 0.19 | 1.88  | 0.19 | 1.51   | 2.26    |
| modality order | 88.45 | -0.73  | 0.6  | -0.72 | 0.6  | -1.89  | 0.44    |
| stimuli order  | 66.05 | -0.24  | 0.6  | -0.24 | 0.6  | -1.41  | 0.94    |

### Anova table:

| Effect                        | df   | MSE   | F     | p      |
|-------------------------------|------|-------|-------|--------|
| stim_order                    | 1,98 | 18.84 | 0.03  | 0.87   |
| mod_order                     | 1,98 | 18.84 | 1.4   | 0.24   |
| stim_order:mod_order          | 1,98 | 18.84 | 1.51  | 0.22   |
| modality                      | 1,98 | 4.89  | 39.17 | <.0001 |
| stim_order:modality           | 1,98 | 4.89  | 0.58  | 0.45   |
| mod_order:modality            | 1,98 | 4.89  | 4.29  | 0.04   |
| stim_order:mod_order:modality | 1,98 | 4.89  | 1.12  | 0.29   |

## Physiological Measures Heart Rate

### Priors:

Intercept (after predictors centered)

```
~ normal(location = 0, scale = 10)
  **adjusted scale = 6.73
```

Coefficients

```
~ normal(location = [0,0,0], scale = [2.5,2.5,2.5])
  **adjusted scale = [1.68,1.68,1.68]
```

Auxiliary (sigma)

```
~ exponential(rate = 1)
  **adjusted scale = 0.67 (adjusted rate = 1/adjusted scale)
```

Covariance

```
~ decov(reg. = 1, conc. = 1, shape = 1, scale = 1)
```

### Estimates of model parameters:

| Variable       | MPE   | Median | MAD  | Mean  | SD   | CI low | CI high |
|----------------|-------|--------|------|-------|------|--------|---------|
| Intercept      | 79.08 | 0.06   | 0.07 | 0.05  | 0.07 | -0.09  | 0.2     |
| modality       | 100   | -0.17  | 0.05 | -0.17 | 0.05 | -0.27  | -0.08   |
| modality order | 56    | -0.01  | 0.05 | -0.01 | 0.05 | -0.1   | 0.09    |
| stimuli order  | 75.05 | 0.03   | 0.05 | 0.03  | 0.05 | -0.06  | 0.12    |

### Anova table:

| Effect                        | df   | MSE  | F     | p      |
|-------------------------------|------|------|-------|--------|
| stim_order                    | 1,91 | 0.02 | 0.02  | 0.9    |
| mod_order                     | 1,91 | 0.02 | 1.74  | 0.19   |
| stim_order:mod_order          | 1,91 | 0.02 | 0.12  | 0.73   |
| modality                      | 1,91 | 0.2  | 9.16  | 0.003  |
| stim_order:modality           | 1,91 | 0.2  | 1.85  | 0.18   |
| mod_order:modality            | 1,91 | 0.2  | 13.87 | 0.0003 |
| stim_order:mod_order:modality | 1,91 | 0.2  | 0.87  | 0.35   |

## Heart Rate Standard Deviation

### Priors:

Intercept (after predictors centered)

```
~ normal(location = 0, scale = 10)  
  **adjusted scale = 3.78
```

Coefficients

```
~ normal(location = [0,0,0], scale = [2.5,2.5,2.5])  
  **adjusted scale = [0.95,0.95,0.95]
```

Auxiliary (sigma)

```
~ exponential(rate = 1)  
  **adjusted scale = 0.38 (adjusted rate = 1/adjusted scale)
```

Covariance

```
~ decov(reg. = 1, conc. = 1, shape = 1, scale = 1)
```

### Estimates of model parameters:

| Variable       | MPE   | Median | MAD  | Mean  | SD   | CI low | CI high |
|----------------|-------|--------|------|-------|------|--------|---------|
| Intercept      | 100   | 0.66   | 0.04 | 0.66  | 0.04 | 0.58   | 0.75    |
| modality       | 99.95 | -0.08  | 0.03 | -0.08 | 0.03 | -0.13  | -0.03   |
| modality order | 99.73 | 0.08   | 0.03 | 0.08  | 0.03 | 0.02   | 0.13    |
| stimuli order  | 55.78 | 0      | 0.03 | 0     | 0.03 | -0.06  | 0.05    |

### Anova table:

| Effect                        | df   | MSE  | F    | p     |
|-------------------------------|------|------|------|-------|
| stim_order                    | 1,91 | 0.03 | 0.11 | 0.74  |
| mod_order                     | 1,91 | 0.03 | 5.75 | 0.02  |
| stim_order:mod_order          | 1,91 | 0.03 | 0.21 | 0.65  |
| modality                      | 1,91 | 0.04 | 7.7  | 0.007 |
| stim_order:modality           | 1,91 | 0.04 | 0.63 | 0.43  |
| mod_order:modality            | 1,91 | 0.04 | 8.19 | 0.005 |
| stim_order:mod_order:modality | 1,91 | 0.04 | 4.78 | 0.03  |

## EDA

### Priors:

Intercept (after predictors centered)

```
~ normal(location = 0, scale = 10)  
  **adjusted scale = 8.86
```

Coefficients

```
~ normal(location = [0,0,0], scale = [2.5,2.5,2.5])  
  **adjusted scale = [2.21,2.21,2.21]
```

Auxiliary (sigma)

```
~ exponential(rate = 1)  
  **adjusted scale = 0.89 (adjusted rate = 1/adjusted scale)
```

Covariance

```
~ decov(reg. = 1, conc. = 1, shape = 1, scale = 1)
```

### Estimates of model parameters:

| Variable       | MPE   | Median | MAD  | Mean  | SD   | CI low | CI high |
|----------------|-------|--------|------|-------|------|--------|---------|
| Intercept      | 80.03 | 0.12   | 0.15 | 0.13  | 0.15 | -0.17  | 0.43    |
| modality       | 100   | -0.27  | 0.07 | -0.27 | 0.07 | -0.41  | -0.12   |
| modality order | 68.55 | -0.03  | 0.07 | -0.03 | 0.07 | -0.19  | 0.09    |
| stimuli order  | 62.85 | -0.02  | 0.08 | -0.02 | 0.08 | -0.17  | 0.13    |

### Anova table:

| Effect                        | df   | MSE  | F     | p      |
|-------------------------------|------|------|-------|--------|
| stim_order                    | 1,55 | 0.04 | 0.35  | 0.55   |
| mod_order                     | 1,55 | 0.04 | 0.89  | 0.35   |
| stim_order:mod_order          | 1,55 | 0.04 | 0.06  | 0.81   |
| modality                      | 1,55 | 0.51 | 4.49  | 0.04   |
| stim_order:modality           | 1,55 | 0.51 | 0.17  | 0.68   |
| mod_order:modality            | 1,55 | 0.51 | 18.75 | <.0001 |
| stim_order:mod_order:modality | 1,55 | 0.51 | 0.67  | 0.42   |



## Temperature

### Priors:

Intercept (after predictors centered)

```
~ normal(location = 0, scale = 10)  
  **adjusted scale = 9.48
```

Coefficients

```
~ normal(location = [0,0,0], scale = [2.5,2.5,2.5])  
  **adjusted scale = [2.37,2.37,2.37]
```

Auxiliary (sigma)

```
~ exponential(rate = 1)  
  **adjusted scale = 0.95 (adjusted rate = 1/adjusted scale)
```

Covariance

```
~ decov(reg. = 1, conc. = 1, shape = 1, scale = 1)
```

### Estimates of model parameters:

| Variable       | MPE   | Median | MAD  | Mean  | SD   | CI low | CI high |
|----------------|-------|--------|------|-------|------|--------|---------|
| Intercept      | 58.3  | 0.03   | 0.16 | 0.03  | 0.18 | -0.38  | 0.34    |
| modality       | 99.2  | -0.17  | 0.07 | -0.17 | 0.07 | -0.3   | -0.03   |
| modality order | 88.28 | 0.09   | 0.07 | 0.09  | 0.07 | -0.06  | 0.23    |
| stimuli order  | 64.63 | -0.03  | 0.07 | -0.03 | 0.07 | -0.17  | 0.11    |

### Anova table:

| Effect                        | df   | MSE  | F     | p      |
|-------------------------------|------|------|-------|--------|
| stim_order                    | 1,72 | 0.05 | 0.55  | 0.46   |
| mod_order                     | 1,72 | 0.05 | 6.99  | 0.01   |
| stim_order:mod_order          | 1,72 | 0.05 | 0.51  | 0.48   |
| modality                      | 1,72 | 0.74 | 1.87  | 0.18   |
| stim_order:modality           | 1,72 | 0.74 | 0.00  | 0.95   |
| mod_order:modality            | 1,72 | 0.74 | 13.01 | 0.0006 |
| stim_order:mod_order:modality | 1,72 | 0.74 | 0.02  | 0.9    |

## Acceleration

### Priors:

Intercept (after predictors centered)

```
~ normal(location = 0, scale = 10)  
  **adjusted scale = 3.20
```

Coefficients

```
~ normal(location = [0,0,0], scale = [2.5,2.5,2.5])  
  **adjusted scale = [0.80,0.80,0.80]
```

Auxiliary (sigma)

```
~ exponential(rate = 1)  
  **adjusted scale = 0.32 (adjusted rate = 1/adjusted scale)
```

Covariance

```
~ decov(reg. = 1, conc. = 1, shape = 1, scale = 1)
```

### Estimates of model parameters:

| Variable       | MPE   | Median | MAD  | Mean  | SD   | CI low | CI high |
|----------------|-------|--------|------|-------|------|--------|---------|
| Intercept      | 54.7  | 0      | 0.03 | 0     | 0.03 | -0.05  | 0.05    |
| modality       | 76.2  | -0.02  | 0.02 | -0.02 | 0.02 | -0.06  | 0.03    |
| modality order | 55.68 | 0      | 0.02 | 0     | 0.02 | -0.05  | 0.04    |
| stimuli order  | 80.53 | 0.02   | 0.02 | 0.02  | 0.02 | -0.02  | 0.06    |

### Anova table:

| Effect                        | df   | MSE  | F    | p    |
|-------------------------------|------|------|------|------|
| stim_order                    | 1,91 | 0.01 | 1.07 | 0.3  |
| mod_order                     | 1,91 | 0.01 | 0.03 | 0.87 |
| stim_order:mod_order          | 1,91 | 0.01 | 2.19 | 0.14 |
| modality                      | 1,91 | 0.05 | 0.29 | 0.59 |
| stim_order:modality           | 1,91 | 0.05 | 0.22 | 0.64 |
| mod_order:modality            | 1,91 | 0.05 | 0    | 0.96 |
| stim_order:mod_order:modality | 1,91 | 0.05 | 0.04 | 0.85 |
